# Supplementary material for: A high-throughput phenotypic screen identifies clofazimine as a potential treatment for cryptosporidiosis
Source: PubMed Central journal article supplement (PMC5310922; doi:10.1371/journal.pntd.0005373), 2017-02-03
Supplement: pntd.0005373.s001.pdf [file pntd.0005373.s001.pdf]

| <b>Statistic</b>          | <b>Value</b> |
|---------------------------|--------------|
| Average Spot Count – DMSO | 829          |
| Average Spot Count – FDU  | 143          |
| Standard Deviation – DMSO | 183          |
| Standard Deviation – FDU  | 55           |
| %CV – DMSO                | 22.0         |
| %CV – FDU                 | 38.6         |
| Window                    | 5.81         |
| Z' Factor <sup>a</sup>    | 0.24         |
| Robust Z'                 | 0.45         |

<sup>a</sup>Z' Factor is defined as:  $Z' = 1 - \frac{3(\sigma_p + \sigma_n)}{|\mu_p - \mu_n|}$
