# Supplementary material for: A high-throughput phenotypic screen identifies clofazimine as a potential treatment for cryptosporidiosis
Source: PubMed Central journal article supplement (PMC5310922; doi:10.1371/journal.pntd.0005373), 2017-02-03
Supplement: pntd.0005373.s003.pdf [file pntd.0005373.s003.pdf]

| <b>Compound</b> | <b>Pre-wash<br/>EC<sub>50</sub> (μM)</b> | <b>Post-wash<br/>EC<sub>50</sub> (μM)</b> |
|-----------------|------------------------------------------|-------------------------------------------|
| Nitazoxanide    | >30                                      | 2.53                                      |
| Floxuridine     | 0.053                                    | 0.0094                                    |
| BKI-1294        | >12.5                                    | 0.955                                     |
| Clofazimine     | 0.023                                    | 0.0070                                    |
